# Supplementary material for: The correlation of copy number variations with longevity in a genome-wide association study of Han Chinese
Source: Aging (Albany NY). 2018 Jun 5;10(6):1206–22. doi: 10.18632/aging.101461 (PMC6046244; doi:10.18632/aging.101461)
Supplement: Supplementary Table 4 [file aging-10-101461-s002.xlsx]

## Sheet: eQTL_function_annotation
chr	pos (hg19)	LD	LD	variant	Ref	Alt	AFR	AMR	ASN	EUR	Promoter	Enhancer	DNAse	Proteins	Motifs	NHGRI/EBI	GRASP QTL	Selected eQTL	GENCODE	dbSNP
		(r²)	(D')				freq	freq	freq	freq	histone marks	histone marks		bound	changed	GWAS hits	hits	hits	genes	func annot
19	21962345	0	0	rs12608935	T	C	0.1	0.36	0.53	0.47					GR,T3R			17 hits	3.7kb 3' of ZNF208
19	21962865	0	0	rs7253518	C	T	0.6	0.57	0.7	0.58					5 altered motifs		1 hit	22 hits	3.2kb 3' of ZNF208
19	21963066	0	0	rs6511303	C	T	0.78	0.59	0.7	0.58					MZF1::1-4			19 hits	3kb 3' of ZNF208
19	21963321	0	0	rs10417635	T	G	0.27	0.2	0.17	0.11					7 altered motifs			21 hits	2.8kb 3' of ZNF208
19	21963497	0	0	rs58270321	G	A	0.78	0.59	0.7	0.58					12 altered motifs			19 hits	2.6kb 3' of ZNF208
19	21964535	0	0	rs10410985	C	T	0.6	0.57	0.7	0.58					HMG-IY,Sox			22 hits	1.6kb 3' of ZNF208
19	21964648	0	0	rs8108093	C	T	0.77	0.57	0.7	0.58					4 altered motifs			17 hits	1.4kb 3' of ZNF208
19	21965150	0	0	rs10418985	T	C	0.6	0.57	0.7	0.58					Rad21		1 hit	22 hits	944bp 3' of ZNF208
19	21965299	0	0	rs10417673	A	T	0.62	0.58	0.7	0.58					4 altered motifs			20 hits	795bp 3' of ZNF208
19	21965400	0	0	rs66814910	G	A	0.24	0.2	0.17	0.11					HDAC2,Nanog,STAT			20 hits	694bp 3' of ZNF208
19	21965780	0	0	rs11085504	A	T	0.78	0.59	0.7	0.58					Hbp1,Pax-4			19 hits	314bp 3' of ZNF208
19	21965869	0	0	rs11085505	G	C	0.78	0.59	0.7	0.59					Rad21			19 hits	225bp 3' of ZNF208
19	21966242	0	0	rs1064170	T	A	0.78	0.59	0.7	0.58					Pou3f2			19 hits	ZNF208	3'-UTR
19	21966656	0	0	rs2188972	A	G	0.12	0.36	0.53	0.47					Mef2,Pou5f1,ZEB1			17 hits	ZNF208	3'-UTR
19	21967560	0	0	rs10412331	C	T	0.78	0.59	0.7	0.58					7 altered motifs			19 hits	ZNF208	3'-UTR
19	21968066	0	0	rs12985553	C	T	0.08	0.35	0.53	0.47					Pou3f3			16 hits	ZNF208	3'-UTR
19	21968135	0	0	rs10415080	T	C	0.25	0.37	0.53	0.47								20 hits	ZNF208	3'-UTR
19	21968543	0	0	rs2158107	T	G	0.62	0.58	0.7	0.59					5 altered motifs			20 hits	ZNF208	3'-UTR
19	21968775	0	0	rs35935777	A	AT	0.78	0.58	0.7	0.58					4 altered motifs			15 hits	ZNF208	3'-UTR
19	21969380	0	0	rs2188971	T	C	0.67	0.58	0.71	0.59							1 hit	23 hits	ZNF208	3'-UTR
19	21969725	0	0	rs2359810	G	A	0.67	0.58	0.71	0.59					GR,Irx			23 hits	ZNF208	3'-UTR
19	21969744	0	0	rs34371812	CTT	C	0.1	0.36	0.51	0.47					8 altered motifs			18 hits	ZNF208	3'-UTR
19	21970335	0	0	rs1987570	A	C,G,T	0.67	0.58	0.71	0.59								23 hits	ZNF208	3'-UTR
19	21970693	0	0	rs2359812	A	T	0.73	0.59	0.71	0.59				ZNF274	SIX5		1 hit	20 hits	ZNF208	3'-UTR
19	21970832	0	0	rs4456632	G	A	0.38	0.2	0.2	0.11					AP-4			17 hits	ZNF208	3'-UTR
19	21970894	0	0	rs4378732	G	A	0.67	0.57	0.71	0.59					HNF1			23 hits	ZNF208	3'-UTR
19	21970999	0	0	rs8104333	G	C	0.16	0.19	0.2	0.11					GR			23 hits	ZNF208	3'-UTR
19	21971006	0	0	rs4550595	C	T	0.07	0.36	0.51	0.47					CEBPB			18 hits	ZNF208	3'-UTR
19	21971930	0	0	rs8108957	T	C	0.62	0.54	0.68	0.56				ZNF274	DMRT4,Nrf-2			19 hits	ZNF208	missense
19	21972152	0	0	rs2214301	C	T	0.67	0.59	0.71	0.59					11 altered motifs		1 hit	24 hits	ZNF208	missense
19	21972718	0	0	rs7258270	A	G	0.37	0.19	0.2	0.11					Pax-4,Pou2f2			13 hits	ZNF208	synonymous
19	21972955	0	0	rs7258849	G	A	0.18	0.18	0.2	0.11								22 hits	ZNF208	synonymous
19	21973116	0	0	rs10425763	T	C	0.26	0.38	0.5	0.47					Foxd1,TEF-1			21 hits	ZNF208	missense
19	21973680	0	0	rs12975751	G	T	0.11	0.36	0.51	0.47					5 altered motifs			20 hits	ZNF208	missense
19	21973783	0	0	rs1018912	G	T	0.8	0.62	0.72	0.64					7 altered motifs		4 hits	34 hits	ZNF208	synonymous
19	21974141	0	0	rs12462668	G	A	0.18	0.19	0.2	0.11								23 hits	ZNF208	missense
19	21974190	0	0	rs2007506	C	T	0.67	0.58	0.71	0.58					4 altered motifs			24 hits	ZNF208	missense
19	21974500	0	0	rs10419899	G	A	0.65	0.57	0.71	0.58					ATF3,Foxd1,XBP-1			22 hits	ZNF208	synonymous
19	21975365	0	0	rs10426971	G	A	0.26	0.38	0.51	0.47					NRSF,Nanog			24 hits	ZNF208	intronic
19	21975497	0	0	rs1987975	C	A	0.67	0.58	0.71	0.59					Sox		1 hit	25 hits	ZNF208	intronic
19	21975600	0	0	rs1987974	T	A	0.7	0.59	0.71	0.59					Sox		1 hit	21 hits	ZNF208	intronic
19	21976190	0	0	rs8103214	C	T	0.67	0.58	0.71	0.59					4 altered motifs		2 hits	25 hits	ZNF208	intronic
19	21977502	0	0	rs8108535	T	G	0.67	0.58	0.71	0.58					NRSF,SF1			25 hits	ZNF208	intronic
19	21977736	0	0	rs2079064	G	A	0.67	0.58	0.71	0.59					Foxp3,PRDM1,p300			25 hits	ZNF208	intronic
19	21977872	0	0	rs2079063	C	T	0.22	0.19	0.2	0.11					4 altered motifs		1 hit	21 hits	ZNF208	intronic
19	21977907	0	0	rs12979885	C	T	0.1	0.36	0.51	0.47					Hand1,YY1			19 hits	ZNF208	intronic
19	21978264	0	0	rs73538835	G	A	0.22	0.19	0.2	0.11					RXRA,TBX5			21 hits	ZNF208	intronic
19	21978688	0	0	rs7247121	T	C	0.58	0.58	0.71	0.59							1 hit	24 hits	ZNF208	intronic
19	21979816	0	0	rs56408994	T	C	0.38	0.2	0.2	0.11					4 altered motifs			17 hits	ZNF208	intronic
19	21980122	0	0	rs6511305	G	A	0.67	0.58	0.71	0.59								25 hits	ZNF208	intronic
19	21980295	0	0	rs199663483	C	CTTA	0.64	0.53	0.68	0.54					RXRA			19 hits	ZNF208	intronic
19	21980804	0	0	rs2214298	T	C	0.27	0.38	0.51	0.47					Foxo,Sox			23 hits	ZNF208	intronic
19	21981046	0	0	rs6511306	A	G	0.73	0.59	0.71	0.59					CDP,Irf			22 hits	ZNF208	intronic
19	21981355	0	0	rs6511307	T	C	0.7	0.58	0.71	0.59								25 hits	ZNF208	intronic
19	21981527	0	0	rs6511308	T	C	0.73	0.59	0.71	0.59					Hoxb8			22 hits	ZNF208	intronic
19	21981844	0	0	rs4290587	A	G	0.96	0.7	0.79	0.76					SRF			50 hits	ZNF208	intronic
19	21983394	0	0	rs7248938	A	G	0.38	0.2	0.2	0.11								17 hits	ZNF208	intronic
19	21983937	0	0	rs7260454	C	T	0.22	0.19	0.2	0.11					Arnt			21 hits	ZNF208	intronic
19	21984199	0	0	rs10401697	G	A	0.67	0.58	0.71	0.59					16 altered motifs			25 hits	ZNF208	intronic
19	21985054	0	0	rs75943549	TG	T	0.39	0.19	0.19	0.11					CDP,Mef2			16 hits	ZNF208	intronic
19	21985339	0	0	rs2359813	C	T	0.67	0.58	0.71	0.59					TEF		1 hit	25 hits	ZNF208	intronic
19	21986000	0	0	rs10416159	G	A	0.67	0.58	0.71	0.59							1 hit	25 hits	ZNF208	intronic
19	21986747	0	0	rs12980606	A	G	0.1	0.36	0.52	0.47					SIX5			20 hits	ZNF208	intronic
19	21986971	0	0	rs1988427	A	G	0.67	0.58	0.71	0.59								25 hits	ZNF208	intronic
19	21987749	0	0	rs8101183	C	A	0.73	0.59	0.71	0.59					5 altered motifs			22 hits	ZNF208	intronic
19	21988447	0	0	rs11670558	T	A	0.67	0.58	0.71	0.59					5 altered motifs			25 hits	ZNF208	intronic
19	21988565	0	0	rs80117552	T	C	0.12	0.17	0.2	0.11					14 altered motifs			24 hits	ZNF208	intronic
19	21989078	0	0	rs4574045	C	T	0.67	0.57	0.71	0.58					6 altered motifs			25 hits	ZNF208	intronic
19	21989145	0	0	rs2359814	A	G	0.73	0.59	0.71	0.59					12 altered motifs			22 hits	ZNF208	intronic
19	21989918	0	0	rs75181699	T	G	0.25	0.38	0.51	0.47					4 altered motifs			24 hits	ZNF208	intronic
19	21990938	0	0	rs4265943	T	A	0.09	0.33	0.46	0.41					HP1-site-factor			16 hits	ZNF208	intronic
19	21991434	0	0	rs10402796	T	C	0.67	0.58	0.71	0.59					8 altered motifs			25 hits	ZNF208	intronic
19	21991490	0	0	rs6511309	T	C	0.95	0.7	0.79	0.76					NRSF,Pitx2,SETDB1			50 hits	ZNF208	intronic
19	21991701	0	0	rs10592767	TTG	T	0.18	0.18	0.2	0.11					AhR,Cphx			24 hits	ZNF208	intronic
19	21991950	0	0	rs8103163	A	C	0.67	0.58	0.71	0.59					Nkx3			25 hits	ZNF208	intronic
19	21992070	0	0	rs8103368	A	G	0.67	0.58	0.71	0.59					6 altered motifs			25 hits	ZNF208	intronic
19	21992764	0	0	rs1988501	T	G	0.67	0.58	0.71	0.59					Foxd3,TATA		2 hits	25 hits	ZNF208	intronic
19	21994297	0	0	rs2214297	A	G	0.67	0.58	0.71	0.59								25 hits	ZNF208	intronic
19	21994951	0	0	rs200674456	T	TTC	0.52	0.46	0.62	0.49					10 altered motifs			13 hits	ZNF208	intronic
19	21994952	0	0	rs34330725	T	TC	0.57	0.46	0.62	0.5					13 altered motifs			12 hits	ZNF208	intronic
19	21995012	0	0	rs10418541	T	C	0.67	0.58	0.71	0.59					HNF4,SREBP			24 hits	ZNF208	intronic
19	21995883	0	0	rs9304993	A	G	0.67	0.58	0.71	0.58					6 altered motifs		1 hit	24 hits	ZNF208	intronic
19	21997919	0	0	rs4932723	C	G	0.67	0.58	0.71	0.59					GR		1 hit	25 hits	ZNF208	intronic
19	21998003	0	0	rs1963300	A	G	0.67	0.58	0.71	0.58					AP-1,Pbx-1,Smad3			24 hits	ZNF208	intronic
19	21998127	0	0	rs148452640	AAT	A	0.43	0.21	0.2	0.11					HDAC2,Zfp105			11 hits	ZNF208	intronic
19	21998683	0	0	rs2078235	C	A	0.72	0.55	0.67	0.54					CACD,Glis2,PLAG1			14 hits	ZNF208	intronic
19	21999137	0	0	rs11085506	A	G	0.68	0.58	0.71	0.59					Cdx,Sox			25 hits	ZNF208	intronic
19	21999251	0	0	rs11668920	T	C	0.28	0.38	0.51	0.47					Nkx2			24 hits	ZNF208	intronic
19	22000247	0	0	rs7246239	G	A	0.39	0.2	0.2	0.11					HMG-IY,Hoxd10			18 hits	ZNF208	intronic
19	22000658	0	0	rs7249472	A	G	0.68	0.58	0.71	0.59					SP2			25 hits	ZNF208	intronic
19	22001118	0	0	rs7249976	A	T	0.97	0.7	0.79	0.76					Mef2			50 hits	ZNF208	intronic
19	22001240	0	0	rs2106870	G	A	0.68	0.59	0.71	0.59								20 hits	ZNF208	intronic
19	22001891	0	0	rs2106869	C	T	0.72	0.61	0.67	0.59					5 altered motifs			16 hits	ZNF208	intronic
19	22002176	0	0	rs7255484	T	C	0.12	0.17	0.2	0.11								24 hits	ZNF208	intronic
19	22002440	0	0	rs8108807	G	A	0.68	0.58	0.71	0.59					Pou5f1			25 hits	ZNF208	intronic
19	22002615	0	0	rs8112395	T	C	0.65	0.57	0.7	0.58					4 altered motifs			27 hits	ZNF208	intronic
19	22003908	0	0	rs2158106	C	T	0.07	0.36	0.51	0.47					Hic1,XBP-1,p53			17 hits	ZNF208	intronic
19	22004958	0	0	rs2359815	C	A	0.74	0.59	0.71	0.59					PRDM1,RXRA		1 hit	17 hits	ZNF208	intronic
19	22005475	0	0	rs4592778	A	G	0.68	0.58	0.71	0.59								25 hits	ZNF208	intronic
19	22005907	0	0	rs7248488	A	C	0.68	0.58	0.71	0.59					CIZ,Irf,NF-kappaB		2 hits	25 hits	ZNF208	intronic
19	22006437	0	0	rs73017852	T	G	0.37	0.2	0.2	0.11					6 altered motifs			17 hits	ZNF208	intronic
19	22007277	0	0	rs8108160	T	C	0.67	0.58	0.72	0.59					GR,Ik-1,NRSF			24 hits	ZNF208	intronic
19	22007576	0	0	rs10420483	A	G	0.96	0.7	0.79	0.76					HDAC2,ZEB1			50 hits	ZNF208	intronic
19	22008163	0	0	rs8111955	T	C	0.73	0.58	0.71	0.59					CACD,Ets,NRSF			22 hits	ZNF208	intronic
19	22009039	0	0	rs67458228	C	T	0.18	0.19	0.2	0.11					4 altered motifs			23 hits	ZNF208	intronic
19	22009245	0	0	rs7246992	G	A	0.38	0.2	0.2	0.11					Ik-2,Ik-3			19 hits	ZNF208	intronic
19	22010082	0	0	rs10410914	G	A	0.32	0.38	0.5	0.47			6 tissues		BDP1,LUN-1,Maf			24 hits	ZNF208	intronic
19	22010329	0	0	rs8105991	T	C	0.33	0.38	0.51	0.47	14 tissues	BLD			NRSF,Zfp410,Zic			24 hits	ZNF208	intronic
19	22011184	0	0	rs11085508	A	C	0.07	0.36	0.51	0.47	9 tissues		IPSC		5 altered motifs		1 hit	17 hits	240bp 5' of ZNF208
19	22011438	0	0	rs60871663	C	T	0.39	0.19	0.2	0.11		BLD			Mef2			19 hits	494bp 5' of ZNF208
19	22011802	0	0	rs10424932	G	T	0.34	0.37	0.49	0.47					8 altered motifs			18 hits	858bp 5' of ZNF208
19	22011949	0	0	rs10425160	G	C	0.7	0.56	0.66	0.54					Rad21			17 hits	1kb 5' of ZNF208
19	22012027	0	0	rs67441682	T	C	0.18	0.19	0.2	0.11								23 hits	1.1kb 5' of ZNF208
19	22012520	0	0	rs8100117	T	C	0.54	0.22	0.2	0.12								11 hits	1.6kb 5' of ZNF208
19	22013774	0	0	rs55674738	C	T	0.38	0.2	0.2	0.11					4 altered motifs			21 hits	2.8kb 5' of ZNF208
19	22014483	0	0	rs6511310	C	A	0.38	0.2	0.2	0.11							1 hit	18 hits	3.5kb 5' of ZNF208
19	22014801	0	0	rs4458136	C	T	0.24	0.35	0.5	0.45					5 altered motifs			17 hits	3.9kb 5' of ZNF208
19	22015874	0	0	rs2359816	G	A	0.24	0.36	0.5	0.45					Ets,Zbtb3			16 hits	4.9kb 5' of ZNF208
19	22017580	0	0	rs2188970	G	A	0.91	0.66	0.75	0.71								43 hits	6.6kb 5' of ZNF208
19	22018002	0	0	rs68118096	C	T	0.18	0.19	0.2	0.11					Irf			24 hits	7.1kb 5' of ZNF208
19	22019937	0	0	rs8109237	A	G	0.52	0.22	0.2	0.12					10 altered motifs			12 hits	9kb 5' of ZNF208
19	22019981	0	0	rs2188969	A	G	0.96	0.7	0.8	0.76					ATF3			50 hits	9kb 5' of ZNF208
19	22020412	0	0	rs4932932	C	T	0.53	0.2	0.19	0.12			SKIN		NRSF,Sin3Ak-20,Zbtb3		2 hits	11 hits	9.5kb 5' of ZNF208
19	22020435	0	0	rs4244912	T	A	0.97	0.7	0.8	0.76			SKIN		DMRT3,DMRT5,Myc			50 hits	9.5kb 5' of ZNF208
19	22021771	0	0	rs11085509	T	C	0.97	0.7	0.8	0.76					6 altered motifs			50 hits	11kb 5' of ZNF208
19	22022547	0	0	rs6511312	A	T	0.42	0.48	0.6	0.63					CDP,FXR,Nkx2			11 hits	12kb 5' of ZNF208
19	22022726	0	0	rs1989120	T	C	0.68	0.68	0.79	0.74					Ik-1,Ik-3,Rad21			48 hits	12kb 5' of ZNF208
19	22022764	0	0	rs1988568	C	T	0.77	0.7	0.79	0.75					4 altered motifs			49 hits	12kb 5' of ZNF208
19	22022863	0	0	rs1989119	T	G	0.38	0.55	0.72	0.57					Nanog,PTF1-beta,STAT			20 hits	12kb 5' of ZNF208
19	22022877	0	0	rs1989118	A	G	0.47	0.56	0.72	0.58					Evi-1,Mef2,PEBP			22 hits	12kb 5' of ZNF208
19	22023327	0	0	rs10854064	C	T	0.4	0.39	0.51	0.47					4 altered motifs			22 hits	12kb 5' of ZNF208
19	22024662	0	0	rs12461536	A	G	0.3	0.19	0.2	0.11					GR,Pou6f1			19 hits	14kb 5' of ZNF208
19	22024862	0	0	rs61191894	GC	G	0.3	0.2	0.2	0.12					11 altered motifs			19 hits	14kb 5' of ZNF208
19	22025252	0	0	rs7408384	C	T	0.32	0.22	0.2	0.13					5 altered motifs			12 hits	14kb 5' of ZNF208
19	22025512	0	0	rs2359821	C	T	0.97	0.7	0.8	0.76					TEF-1			50 hits	15kb 5' of ZNF208
19	22025730	0	0	rs67520962	8-mer	G	0.2	0.36	0.51	0.46					AP-1,YY1,ZEB1			19 hits	15kb 5' of ZNF208
19	22025799	0	0	rs1985744	G	T	0.07	0.36	0.51	0.47					AP-2rep			17 hits	15kb 5' of ZNF208
19	22025809	0	0	rs8106352	A	T	0.3	0.19	0.2	0.11					4 altered motifs			19 hits	15kb 5' of ZNF208
19	22025949	0	0	rs2017962	T	C	0.96	0.7	0.8	0.76			PLCNT		7 altered motifs		7 hits	50 hits	15kb 5' of ZNF208
19	22026426	0	0	rs7253170	A	G	0.32	0.2	0.2	0.11			PLCNT		5 altered motifs		2 hits	19 hits	15kb 5' of ZNF208
19	22026951	0	0	rs2078089	A	T	0.97	0.7	0.8	0.76			PLCNT	CEBPB	8 altered motifs		6 hits	50 hits	16kb 5' of ZNF208
19	22026965	0	0	rs12462824	A	G	0.31	0.19	0.2	0.11			PLCNT	CEBPB	6 altered motifs			19 hits	16kb 5' of ZNF208
19	22027382	0	0	rs12460903	T	C	0.3	0.19	0.2	0.11					BRCA1		1 hit	19 hits	16kb 5' of ZNF208
19	22027599	0	0	rs10401339	A	T	0.21	0.37	0.51	0.47					Nkx2,Zic			19 hits	17kb 5' of ZNF208
19	22027845	0	0	rs55638635	G	A	0.31	0.19	0.2	0.11					Irf,Msx-1			19 hits	17kb 5' of ZNF208
19	22028635	0	0	rs8103879	A	G	0.3	0.19	0.2	0.11					4 altered motifs		1 hit	19 hits	18kb 5' of ZNF208
19	22030309	0	0	rs7255049	A	G	0.78	0.69	0.8	0.75							7 hits	49 hits	19kb 5' of ZNF208
19	22030328	0	0	rs7255179	C	G	0.3	0.19	0.2	0.11					Ets,SMC3,SREBP			19 hits	19kb 5' of ZNF208
19	22030899	0	0	rs7258843	A	C	0.3	0.19	0.2	0.11			GI		KAP1			19 hits	20kb 5' of ZNF208
19	22031109	0	0	rs34190595	ACT	A	0.21	0.37	0.51	0.47					TATA			19 hits	20kb 5' of ZNF208
19	22031143	0	0	rs7259460	G	A	0.29	0.19	0.2	0.11					GCM			19 hits	20kb 5' of ZNF208
19	22031320	0	0	rs441017	T	C	0.39	0.39	0.51	0.47					Pax-4			23 hits	20kb 5' of ZNF208
19	22031455	0	0	rs7259527	A	G	0.3	0.19	0.2	0.11					5 altered motifs			19 hits	21kb 5' of ZNF208
19	22031550	0	0	rs429184	A	C	0.97	0.7	0.8	0.75					RXRA			50 hits	21kb 5' of ZNF208
19	22031564	0	0	rs7248507	T	C	0.32	0.2	0.2	0.11								19 hits	21kb 5' of ZNF208
19	22031618	0	0	rs7247687	C	T	0.3	0.19	0.2	0.11					STAT			19 hits	21kb 5' of ZNF208
19	22031645	0	0	rs7248542	T	C	0.32	0.2	0.2	0.11					CEBPB,Evi-1			19 hits	21kb 5' of ZNF208
19	22032071	0	0	rs436039	T	C	0.97	0.7	0.8	0.75					5 altered motifs			50 hits	20kb 5' of ZNF257
19	22032191	0	0	rs2359826	C	T	0.22	0.19	0.2	0.11					5 altered motifs			22 hits	20kb 5' of ZNF257
19	22032264	0	0	rs1975167	A	T	0.3	0.19	0.2	0.11					Pbx-1		1 hit	19 hits	20kb 5' of ZNF257
19	22032639	0	0	rs8105767	A	G	0.54	0.31	0.28	0.28							1 hit	28 hits	20kb 5' of ZNF257
19	22033165	0	0	rs404822	A	C	0.97	0.7	0.8	0.76			SKIN		E2A,Pax-2,Spz1		6 hits	50 hits	19kb 5' of ZNF257
19	22033564	0	0	rs4932940	A	G	0.27	0.19	0.2	0.11					17 altered motifs			23 hits	19kb 5' of ZNF257
19	22033867	0	0	rs12459526	C	T	0.27	0.19	0.2	0.11								23 hits	19kb 5' of ZNF257
19	22033910	0	0	rs452459	T	G	0.21	0.36	0.52	0.47					CTCF,Hmx			17 hits	19kb 5' of ZNF257
19	22034026	0	0	rs8103503	G	A	0.27	0.19	0.2	0.11								23 hits	18kb 5' of ZNF257
19	22036361	0	0	rs1654509	C	T	0.4	0.39	0.51	0.47								21 hits	16kb 5' of ZNF257
19	22036708	0	0	rs437192	C	G	0.21	0.37	0.51	0.47					19 altered motifs			19 hits	16kb 5' of ZNF257
19	22037214	0	0	rs2359827	G	C	0.27	0.19	0.2	0.11					KAP1,Myf,Pax-6			24 hits	15kb 5' of ZNF257
19	22037485	0	0	rs2359828	A	G	0.28	0.19	0.2	0.11					Pou3f2,RFX5,TCF12			24 hits	15kb 5' of ZNF257
19	22037741	0	0	rs403997	T	C	0.21	0.37	0.51	0.47					Pou2f2			19 hits	15kb 5' of ZNF257
19	22038056	0	0	rs7251237	C	A	0.26	0.19	0.2	0.11					10 altered motifs			24 hits	14kb 5' of ZNF257
19	22039353	0	0	rs2359829	T	G	0.19	0.19	0.2	0.11					GR,Isl2		1 hit	23 hits	13kb 5' of ZNF257
19	22039434	0	0	rs431328	A	G	0.78	0.68	0.8	0.75					SETDB1,TCF12			49 hits	13kb 5' of ZNF257
19	22040082	0	0	rs424066	T	C	0.21	0.37	0.51	0.47					AP-1,HNF6,Hmx			19 hits	12kb 5' of ZNF257
19	22041228	0	0	rs417947	G	A	0.07	0.36	0.51	0.47					Spz1		1 hit	17 hits	11kb 5' of ZNF257
19	22041918	0	0	rs55772746	A	G	0.3	0.19	0.2	0.11					HNF4,ZID,Zbtb12			21 hits	11kb 5' of ZNF257
19	22042212	0	0	rs58132720	G	A	0.3	0.19	0.2	0.11					4 altered motifs			21 hits	10kb 5' of ZNF257
19	22042535	0	0	rs408124	A	G	0.4	0.39	0.51	0.47								21 hits	9.9kb 5' of ZNF257
19	22043357	0	0	rs410794	A	G	0.97	0.7	0.73	0.75					Pou5f1		6 hits	50 hits	9.1kb 5' of ZNF257
19	22043487	0	0	rs12460852	C	T	0.23	0.18	0.19	0.11					4 altered motifs		1 hit	24 hits	9kb 5' of ZNF257
19	22044630	0	0	rs409439	C	T	0.96	0.7	0.66	0.75			ADRL		4 altered motifs		6 hits	50 hits	7.8kb 5' of ZNF257
19	22045289	0	0	rs548059	A	G	0.5	0.56	0.56	0.56					RXRA,ZID			23 hits	7.2kb 5' of ZNF257
19	22045319	0	0	rs7258834	A	G	0.48	0.56	0.57	0.56					8 altered motifs			23 hits	7.1kb 5' of ZNF257
19	22045413	0	0	rs431346	T	C	0.5	0.57	0.58	0.59							1 hit	22 hits	7.1kb 5' of ZNF257
19	22045725	0	0	rs436194	A	G	0.5	0.57	0.58	0.59					Pdx1		3 hits	22 hits	6.7kb 5' of ZNF257
19	22045990	0	0	rs431474	A	G	0.5	0.57	0.58	0.59					4 altered motifs		3 hits	22 hits	6.5kb 5' of ZNF257
19	22046273	0	0	rs56226428	T	C	0.11	0.17	0.2	0.11					7 altered motifs			28 hits	6.2kb 5' of ZNF257
19	22046473	0	0	rs426299	G	A	0.5	0.57	0.58	0.59								22 hits	6kb 5' of ZNF257
19	22046504	0	0	rs425781	A	G	0.96	0.7	0.66	0.75					13 altered motifs			50 hits	6kb 5' of ZNF257
19	22046705	0	0	rs450641	A	C	0.48	0.57	0.58	0.57					CIZ,Irf			22 hits	5.8kb 5' of ZNF257
19	22046791	0	0	rs403850	C	T	0.15	0.38	0.38	0.47					ZEB1			14 hits	5.7kb 5' of ZNF257
19	22047167	0	0	rs450298	A	C	0.5	0.57	0.58	0.59					5 altered motifs			22 hits	5.3kb 5' of ZNF257
19	22047531	0	0	rs35407365	CAT	C	0.49	0.57	0.58	0.59					4 altered motifs			22 hits	4.9kb 5' of ZNF257
19	22047626	0	0	rs394457	G	T	0.5	0.57	0.58	0.59					5 altered motifs		1 hit	22 hits	4.8kb 5' of ZNF257
19	22047869	0	0	rs409835	T	C	0.96	0.7	0.66	0.74					4 altered motifs		8 hits	50 hits	4.6kb 5' of ZNF257
19	22047992	0	0	rs417628	C	A	0.5	0.57	0.57	0.59					11 altered motifs		1 hit	22 hits	4.5kb 5' of ZNF257
19	22048154	0	0	rs422344	G	C	0.96	0.7	0.66	0.75					HNF4,ZEB1		7 hits	50 hits	4.3kb 5' of ZNF257
11	2919262	0	0	rs450244	T	C	0.94	0.9	0.9	0.92		SKIN, HRT, MUS	BLD,LIV,MUS		6 altered motifs			16 hits	SLC22A18	intronic
11	2921363	0	0	rs1661052	G	A	0.87	0.89	0.91	0.92			CRVX,BRST,BLD		ERalpha-a,Ik-1			16 hits	SLC22A18	intronic
20	62326234	0	0	rs3065759	A	AAC	0.5	0.73	0.88	0.67		SKIN			10 altered motifs			10 hits	LAMA5	intronic
20	62326570	0	0	rs11698103	G	C	0.19	0.19	0.07	0.24		SKIN			Foxo			17 hits	LAMA5	intronic
20	62327827	0	0	rs4925375	C	T	0.6	0.76	0.9	0.69			IPSC		7 altered motifs			10 hits	LAMA5	intronic
20	62328363	0	0	rs7262393	C	T	0.26	0.18	0.07	0.21		SKIN	SKIN,KID	POL2,CTCF	5 altered motifs			12 hits	LAMA5	synonymous
20	62328627	0	0	rs71884793	ACAT	A	0.26	0.18	0.07	0.21		IPSC	IPSC,BLD		Foxp3,Lmo2-complex,TCF12			12 hits	LAMA5	intronic
20	62330999	0	0	rs73613564	C	T	0.08	0.59	0.77	0.65		SKIN, GI	5 tissues	CTCF	15 altered motifs			12 hits	LAMA5	intronic
20	62336902	0	0	rs2890083	G	A	0.09	0.59	0.76	0.65		5 tissues	LIV	POL2	KAP1,Myf,ZEB1			13 hits	LAMA5	intronic
20	62337061	0	0	rs3810550	C	T	0.21	0.15	0.19	0.2		6 tissues	BLD,THYM,LIV	POL2	AP-1,Myf		2 hits	19 hits	LAMA5	intronic
20	62338071	0	0	rs8124907	A	G	0.32	0.19	0.19	0.23	BLD	5 tissues	BLD,LIV		DBP		2 hits	14 hits	LAMA5	synonymous
20	62338439	0	0	rs2151512	T	C	0.09	0.62	0.76	0.68		IPSC, BLD	BLD,BLD		VDR			16 hits	LAMA5	intronic
20	62338992	0	0	rs6089349	G	A	0.1	0.62	0.76	0.68	BLD	BLD			4 altered motifs			13 hits	LAMA5	intronic
20	62339173	0	0	rs6143024	A	G	0.23	0.19	0.19	0.23		BLD	BLD,BLD		5 altered motifs			14 hits	LAMA5	intronic
20	62339395	0	0	rs6143025	G	A	0.23	0.19	0.19	0.23		BLD			CACD,CTCF,Pax-5			14 hits	LAMA5	intronic
20	62340452	0	0	rs6143026	C	T	0.23	0.19	0.19	0.23	GI	BLD, LIV	BLD		Crx,Pitx2			14 hits	LAMA5	intronic
20	62340768	0	0	rs6143029	C	T	0.21	0.15	0.19	0.21		BLD			AP-1			14 hits	LAMA5	intronic
20	62340954	0	0	rs13043914	G	A	0.2	0.18	0.18	0.23		BLD			Nkx2			17 hits	LAMA5	intronic
20	62341097	0	0	rs6089351	G	A	0.09	0.62	0.76	0.68		BLD			7 altered motifs			13 hits	LAMA5	intronic
20	62341657	0	0	rs6121989	A	T	0.13	0.62	0.76	0.68					Mef2,TATA			16 hits	LAMA5	intronic
20	62342238	0	0	rs4925380	G	A	0.11	0.62	0.76	0.68					ERalpha-a,SP1			13 hits	LAMA5	intronic
20	62342533	0	0	rs6143031	G	T	0.2	0.18	0.19	0.23					4 altered motifs			17 hits	LAMA5	intronic
20	62342593	0	0	rs6143032	G	A	0.27	0.18	0.19	0.23					Nanog			16 hits	LAMA5	intronic
20	62342628	0	0	rs6143033	G	A	0.27	0.18	0.19	0.23					4 altered motifs			16 hits	LAMA5	intronic
20	62343031	0	0	rs6142735	G	C	0.26	0.18	0.19	0.23		LNG, LIV, GI	ESDR,LIV	4 bound proteins	5 altered motifs			20 hits	LAMA5	intronic
20	62343486	0	0	rs4925382	G	C	0.08	0.62	0.76	0.68		LNG, LIV, GI	IPSC		GATA			13 hits	LAMA5	intronic
20	62344207	0	0	rs6121990	G	A	0.08	0.62	0.77	0.68			OVRY,LNG		AP-1			13 hits	LAMA5	intronic
20	62344596	0	0	rs6142736	G	A	0.26	0.18	0.18	0.23		LNG, SKIN						16 hits	LAMA5	intronic
20	62344744	0	0	rs6142737	C	G	0.28	0.19	0.18	0.23		LNG, SKIN			Hic1,Pax-4			13 hits	LAMA5	intronic
20	62344904	0	0	rs6142738	T	C	0.28	0.18	0.18	0.23		LNG, SKIN	10 tissues	FOXA1	4 altered motifs		2 hits	16 hits	LAMA5	intronic
20	62345176	0	0	rs4925383	C	T	0.08	0.62	0.77	0.68		SKIN			NRSF			13 hits	LAMA5	intronic
20	62345489	0	0	rs6143034	T	C	0.31	0.19	0.18	0.23		SKIN			Zbtb3,Zfx			16 hits	LAMA5	intronic
20	62345568	0	0	rs4925385	A	G	0.16	0.62	0.77	0.68		IPSC, SKIN, LNG						12 hits	LAMA5	intronic
20	62345644	0	0	rs6143035	T	C	0.31	0.19	0.18	0.23		IPSC, SKIN, LNG			4 altered motifs		2 hits	21 hits	LAMA5	intronic
20	62345831	0	0	rs11204472	G	A	0.16	0.62	0.77	0.68		7 tissues	4 tissues		7 altered motifs			12 hits	LAMA5	synonymous
20	62345988	0	0	rs4925386	T	C	0.21	0.62	0.77	0.68		6 tissues	GI,LIV	CTCF		1 hit	5 hits	15 hits	LAMA5	intronic
20	62346268	0	0	rs2427291	G	A	0	0.1	0.18	0.2		IPSC, SPLN	IPSC	POL2	CAC-binding-protein,Klf7,SP2			16 hits	LAMA5	intronic
20	62346665	0	0	rs6143036	C	A	0.2	0.18	0.18	0.23		IPSC, MUS			CAC-binding-protein,SP1			16 hits	LAMA5	intronic
20	62347456	0	0	rs4925389	G	A	0.28	0.62	0.77	0.68		IPSC, SKIN, MUS	KID					12 hits	LAMA5	intronic
20	62348019	0	0	rs1889201	C	T	0.31	0.62	0.77	0.68		MUS			Nkx2,Nkx3			12 hits	LAMA5	intronic
20	62349051	0	0	rs2427292	C	T	0.2	0.18	0.18	0.23					5 altered motifs			15 hits	LAMA5	intronic
20	62349202	0	0	rs669847	C	T	0.19	0.62	0.77	0.68					9 altered motifs			11 hits	LAMA5	intronic
20	62350803	0	0	rs2427293	C	T	0.21	0.18	0.18	0.24	CRVX	9 tissues	8 tissues	GR,CTCF	8 altered motifs		2 hits	16 hits	LAMA5	intronic
20	62350923	0	0	rs1741634	A	C	0.32	0.62	0.77	0.67	CRVX	9 tissues	8 tissues	GR	EWSR1-FLI1,HDAC2			13 hits	LAMA5	intronic
20	62351050	0	0	rs1760073	A	G	0.29	0.62	0.77	0.67		9 tissues	7 tissues		HEY1,Sin3Ak-20,TCF12			14 hits	LAMA5	intronic
20	62351167	0	0	rs639836	G	A	0.15	0.61	0.77	0.67		8 tissues	5 tissues		SMC3,Zfx			15 hits	LAMA5	intronic
20	62352201	0	0	rs2427294	G	A	0.2	0.18	0.19	0.25	SKIN	10 tissues	LIV,SKIN					17 hits	LAMA5	intronic
20	62352356	0	0	rs624313	G	A	0.16	0.61	0.77	0.67	SKIN	13 tissues			NF-E2,Pax-5,TFIIA			18 hits	LAMA5	synonymous
21	37069908	0	0	rs8127206	T	C	0.24	0.19	0.04	0.12		GI, BLD, LIV						32 hits	PIGP	intronic
21	37070082	0	0	rs738863	G	C	0.57	0.55	0.4	0.63		GI, BLD, LIV	MUS		Gfi1,Gfi1b,Ik-2		8 hits	77 hits	PIGP	intronic
21	37070182	0	0	rs8127496	T	C	0.26	0.36	0.33	0.49		4 tissues	BLD		4 altered motifs		7 hits	117 hits	PIGP	intronic
21	37070406	0	0	rs1023152	C	A	0.1	0.17	0.04	0.12			BLD		Foxm1,RXRA			27 hits	PIGP	intronic
21	37071177	0	0	rs11702020	T	C	0.24	0.19	0.04	0.12	BRN, PANC, BLD	11 tissues	BLD,BLD,BLD	CTCF	Nkx3			31 hits	PIGP	intronic
21	37071374	0	0	rs28503645	A	G	0.09	0.26	0.13	0.49	8 tissues	18 tissues	4 tissues	CTCF	BATF,Pax-6,T3R			115 hits	PIGP	intronic
21	37071878	0	0	rs73200243	T	G	0.1	0.17	0.04	0.12	21 tissues	10 tissues	28 tissues	4 bound proteins	TCF4			26 hits	PIGP	intronic
21	37072581	0	0	rs73200245	G	A	0.37	0.34	0.1	0.16	24 tissues		53 tissues	14 bound proteins	Pax-2,SIX5			37 hits	PIGP	missense
21	37072590	0	0	rs2298682	A	G	0.29	0.36	0.36	0.5	24 tissues		53 tissues	14 bound proteins	SP2		7 hits	128 hits	PIGP	5'-UTR
21	37072695	0	0	rs7280542	A	G	0.71	0.71	0.45	0.66	24 tissues		53 tissues	16 bound proteins	Roaz			72 hits	PIGP	5'-UTR
21	37072769	0	0	rs2298683	T	C	0.34	0.37	0.35	0.5	24 tissues		53 tissues	16 bound proteins	GZF1,Mxi1,Zfp161			117 hits	PIGP	5'-UTR
21	37072795	0	0	rs2298684	G	A	0.33	0.37	0.34	0.5	24 tissues		53 tissues	13 bound proteins	BDP1,Pax-4,Pax-5			117 hits	PIGP	5'-UTR
21	37072988	0	0	rs76037795	C	G	0.12	0.18	0.04	0.12	24 tissues	BLD	53 tissues	10 bound proteins	UF1H3BETA			27 hits	PIGP	intronic
21	37073157	0	0	rs62223585	T	G	0.07	0.15	0.11	0.21	24 tissues	BLD	53 tissues	25 bound proteins	10 altered motifs			28 hits	PIGP	5'-UTR
21	37073315	0	0	rs113166620	G	T	0.23	0.28	0.15	0.34	24 tissues		49 tissues	20 bound proteins	14 altered motifs			39 hits	TTC3	5'-UTR
21	37073579	0	0	rs11701388	A	G	0.79	0.72	0.45	0.66	24 tissues		32 tissues	6 bound proteins	SRF			68 hits	TTC3	intronic
21	37073668	0	0	rs75566647	C	T	0.14	0.19	0.04	0.13	24 tissues		40 tissues	8 bound proteins	CHOP::CEBPalpha			24 hits	TTC3	intronic
21	37073754	0	0	rs11701575	T	C	0.79	0.71	0.45	0.66	24 tissues		35 tissues	10 bound proteins	SP1,SP2,ZBTB7A			68 hits	TTC3	intronic
21	37074019	0	0	rs8128474	A	G	0.38	0.42	0.37	0.58	24 tissues		40 tissues	6 bound proteins	5 altered motifs			95 hits	TTC3	intronic
21	37074281	0	0	rs1543748	T	C	0.36	0.4	0.36	0.53	24 tissues		29 tissues	EGR1,MAX,ZBTB7A				107 hits	TTC3	intronic
21	37074321	0	0	rs1543749	A	G	0.36	0.4	0.35	0.53	24 tissues		23 tissues	MAX	Rad21		7 hits	109 hits	TTC3	intronic
21	37074618	0	0	rs1543750	A	G	0.36	0.4	0.36	0.53	23 tissues	4 tissues	10 tissues		CTCF,Rad21			108 hits	TTC3	intronic
21	37074655	0	0	rs5843790	A	AT	0.36	0.4	0.35	0.53	23 tissues	4 tissues	7 tissues	CEBPB	Zfp105			107 hits	TTC3	intronic
21	37074661	0	0	rs11412056	T	TC,TT	0.28	0.31	0.29	0.44	23 tissues	4 tissues	7 tissues	CEBPB				75 hits	TTC3	intronic
21	37074740	0	0	rs4817843	C	A	0.36	0.4	0.36	0.53	22 tissues	6 tissues	11 tissues	CEBPB	Egr-1,Ets,PLAG1		7 hits	110 hits	TTC3	intronic
21	37074764	0	0	rs4817844	A	T	0.36	0.4	0.36	0.53	22 tissues	6 tissues	13 tissues	CEBPB	DBP,HNF4,STAT		12 hits	111 hits	TTC3	intronic
21	37074832	0	0	rs4817845	T	C	0.36	0.4	0.35	0.53	22 tissues	6 tissues	SKIN,MUS,BLD	CEBPB	4 altered motifs			108 hits	TTC3	intronic
21	37075084	0	0	rs8133274	A	T	0.79	0.72	0.45	0.66	15 tissues	11 tissues			ERalpha-a,TCF4		13 hits	75 hits	TTC3	intronic
21	37075123	0	0	rs6517402	A	C	0.36	0.4	0.36	0.53	12 tissues	12 tissues	OVRY		12 altered motifs			108 hits	TTC3	intronic
21	37075189	0	0	rs8133549	C	T	0.36	0.4	0.36	0.53	12 tissues	12 tissues	BLD					111 hits	TTC3	intronic
21	37075306	0	0	rs67678658	C	T	0.2	0.19	0.04	0.12	14 tissues	12 tissues	BLD,GI,BLD		Pou2f2			27 hits	TTC3	intronic
21	37075639	0	0	rs1155785	A	G	0.36	0.4	0.36	0.53	10 tissues	13 tissues	BLD,BLD	KAP1				108 hits	TTC3	intronic
21	37075725	0	0	rs1155786	A	G	0.35	0.4	0.33	0.52	4 tissues	5 tissues	BLD	KAP1	GATA,Nanog		7 hits	106 hits	TTC3	intronic
21	37075769	0	0	rs1155787	G	A	0.36	0.4	0.36	0.53	4 tissues	5 tissues	BLD	KAP1	Dobox4,Sox			108 hits	TTC3	intronic
21	37076300	0	0	rs60447195	A	T	0.36	0.4	0.36	0.53	ESDR	4 tissues	BRN,LNG		Eomes			108 hits	TTC3	intronic
21	37076580	0	0	rs1015549	T	C	0.36	0.4	0.36	0.53			4 tissues		Eomes		32 hits	114 hits	TTC3	intronic
21	37076948	0	0	rs112034319	G	A	0.2	0.19	0.04	0.12	ESDR	BLD, LIV						27 hits	TTC3	intronic
21	37077210	0	0	rs1015551	G	A	0.37	0.4	0.36	0.53					Bcl6b,Pax-1,Zbtb12		7 hits	111 hits	TTC3	intronic
21	37077708	0	0	rs7280371	T	C	0.36	0.4	0.36	0.53	ESDR, BLD	BLD, LIV			4 altered motifs			108 hits	TTC3	intronic
21	37077725	0	0	rs9975361	T	C	0.36	0.4	0.36	0.53	ESDR, BLD	BLD, LIV			10 altered motifs			107 hits	TTC3	intronic
21	37078017	0	0	rs61701101	G	A	0.36	0.4	0.36	0.53	ESDR, BLD	BLD, LIV	BLD		Foxj1,Foxk1,STAT			107 hits	TTC3	intronic
21	37078257	0	0	rs9975168	C	T	0.36	0.4	0.35	0.53	ESDR, BLD	BLD, LIV			STAT,Sox		10 hits	113 hits	TTC3	intronic
21	37078350	0	0	rs9977602	G	T	0.36	0.4	0.36	0.53		BLD, LIV			NF-kappaB,Otx2			108 hits	TTC3	intronic
21	37078606	0	0	rs141824254	C	CTTAT	0.35	0.4	0.36	0.53		BLD, LIV			18 altered motifs			19 hits	TTC3	intronic
21	37078830	0	0	rs7275582	C	T	0.36	0.4	0.36	0.53		BLD, LIV			Hbp1,Nkx3		11 hits	113 hits	TTC3	intronic
21	37079034	0	0	rs7276917	T	C	0.36	0.4	0.36	0.53	BLD	BLD, LIV	BLD,BLD		6 altered motifs		7 hits	111 hits	TTC3	intronic
21	37079626	0	0	rs8131246	A	G	0.68	0.71	0.45	0.66		BLD, LIV	5 tissues	CTCF,RAD21,SETDB1	5 altered motifs			71 hits	TTC3	intronic
21	37079670	0	0	rs9981706	T	C	0.36	0.39	0.35	0.53		BLD, LIV		CTCF,RAD21	LXR,Pitx2			108 hits	TTC3	intronic
21	37079677	0	0	rs9981207	G	A	0.35	0.39	0.35	0.53		BLD, LIV		CTCF,RAD21	LXR,Myc			109 hits	TTC3	intronic
21	37079722	0	0	rs9981136	C	T	0.36	0.4	0.36	0.53		BLD, LIV		CTCF	4 altered motifs			107 hits	TTC3	intronic
21	37079727	0	0	rs8132580	T	A	0.05	0.17	0.04	0.12		BLD, LIV		CTCF				30 hits	TTC3	intronic
21	37079827	0	0	rs9981226	C	T	0.36	0.4	0.36	0.53		BLD, LIV		CTCF	Osf2,SMC3			108 hits	TTC3	intronic
21	37079900	0	0	rs77440607	A	G	0.03	0.13	0	0.18		BLD, LIV	BLD,MUS,BLD	CTCF	8 altered motifs			34 hits	TTC3	intronic
21	37080079	0	0	rs2187101	T	C,G	0.36	0.42	0.38	0.53		BLD, LIV						105 hits	TTC3	intronic
21	37080334	0	0	rs2156076	C	A	0.37	0.4	0.36	0.53		BLD, LIV, PANC			6 altered motifs		10 hits	113 hits	TTC3	intronic
21	37080883	0	0	rs4411798	A	G	0.35	0.4	0.33	0.52		BLD, ADRL, LIV			Maf		11 hits	108 hits	TTC3	intronic
